# Supplementary material for: Purification, Characterization, and Mode of Action of Pentocin JL-1, a Novel Bacteriocin Isolated from Lactobacillus pentosus, against Drug-Resistant Staphylococcus aureus
Source: Hindawi journal article supplement (doi:10.1155/2017/7657190), 2017-01-01
Supplement: f1 [file 7657190.f1.pdf]

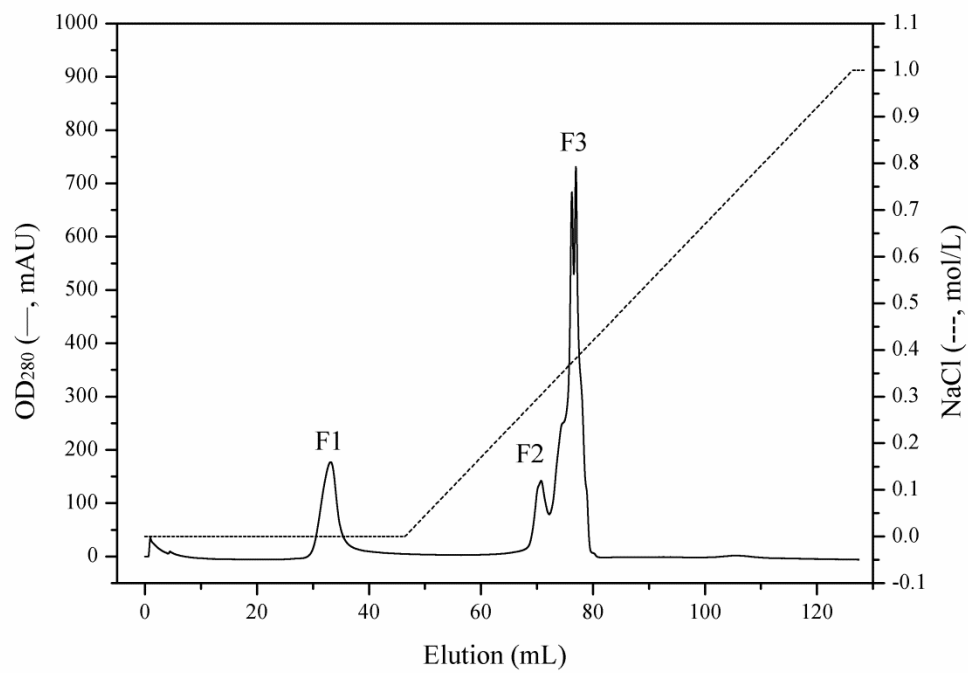

600

601 FIGURE S1: Purification of the bacteriocin produced by *L. pentosus* JL-1 by SP-Sepharose Fast Flow  
602 chromatography.

603

604

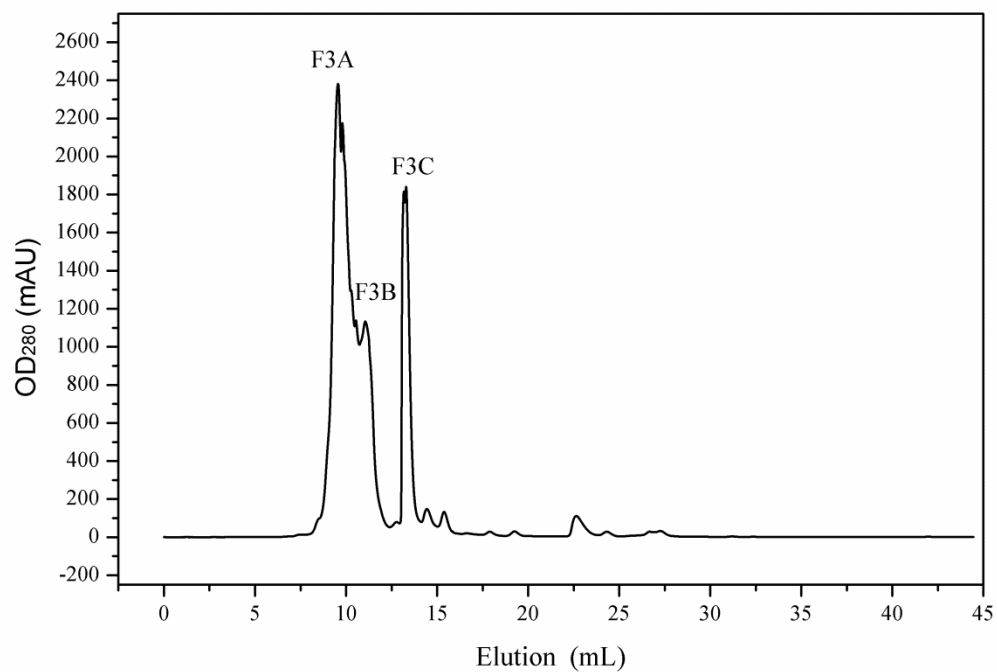

605

606 FIGURE S2: Purification of the bacteriocin produced by *L. pentosus* JL-1 by Ultrahydrogel TM 250 gel  
607 filtration chromatography.

608
